# Supplementary material
Source: Springer Nature journal article supplement (https://www.springermedizin.de/resource/supplementary/12865_2011_434_MOESM4_ESM.pdf/9427984)

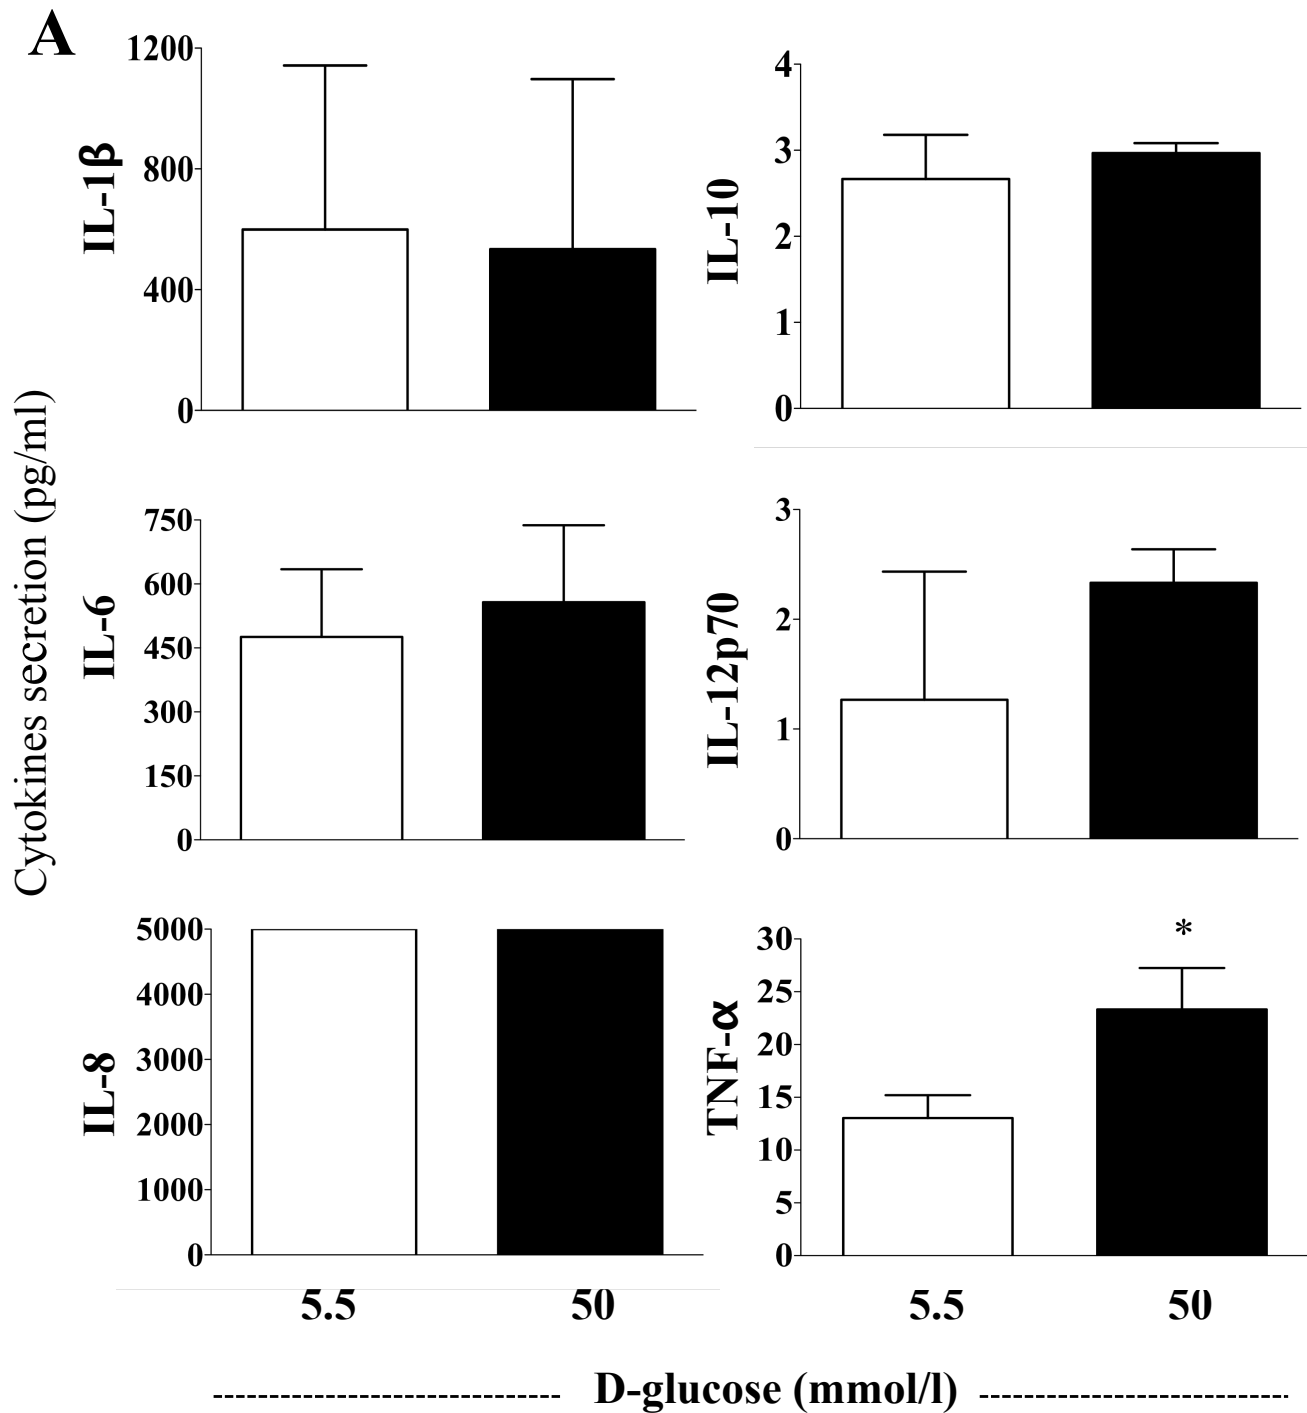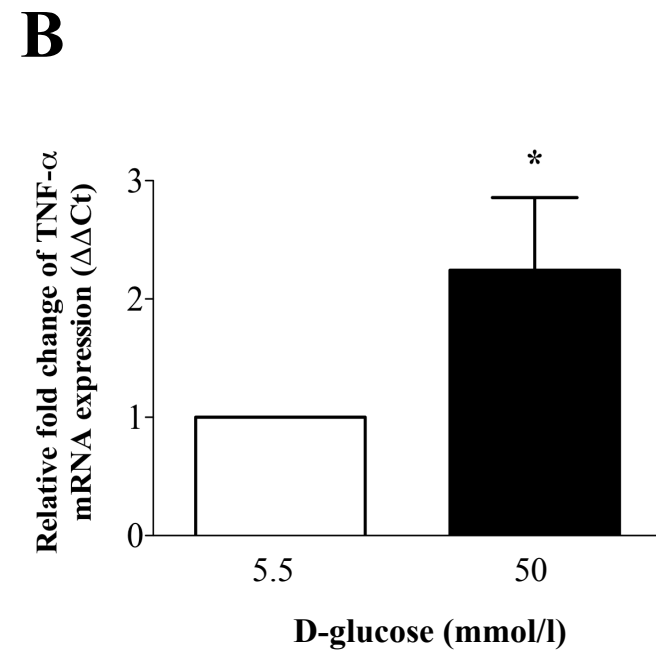

Supplement: MOESM4 [file 9427984]
